# Supplementary material for: Increased impulsivity in response to food cues after sleep loss in healthy young men
Source: PubMed Central journal article supplement — Obesity (Silver Spring). 2014 May 16;22(8):1786–91. doi: 10.1002/oby.20786 (PMC4314688; doi:10.1002/oby.20786), 2014-05-16
Supplement: oby0022-1786-sd1.pdf [file oby0022-1786-sd1.pdf]

**Supplementary Table 1. Food words used for Go/No-go task.** Lists translations of all the 40 food words used as stimuli in the Go/No-go task. The words were presented in Swedish, in which they were matched for word content and presentation order of words within the ten blocks of each version (A/B) of the task. The words were divided into non-food words (Go stimuli; 120 words in each version) and food words (No-Go stimuli; 40 words in each version). The food words were furthermore divided into “Healthy” food words (presented in odd blocks of the task; 20 words) and “Unhealthy” words (presented in even blocks of the task; 20 words). The food words are here presented in the categories Healthy food words and Unhealthy food words; for each category the words have been sorted alphabetically according to the words used for version A of the task, with the corresponding matched word for version B appearing to the right of each word in each of the two food word categories.

| Version A                 | Version B         |
|---------------------------|-------------------|
| <b>Healthy food words</b> |                   |
| Apple                     | Pear              |
| Bell pepper               | Beetroot          |
| Buckwheat                 | Wheatberry        |
| Carrot bread              | Linseed bread     |
| Clementine                | Satsumas          |
| Couscous                  | Bulgur            |
| Fennel                    | Parsley           |
| Flatbread                 | Crisp bread       |
| Lemon                     | Orange            |
| Long bread                | Baguette          |
| Melon                     | Pineapple         |
| Pasta                     | Spaghetti         |
| Peach                     | Plum              |
| Potato                    | Jasmine rice      |
| Quinoa                    | Oatmeal           |
| Rye bread                 | Black rye bread   |
| Salad                     | Cucumber          |
| Sourdough bread           | Whole-wheat bread |
| Tomato                    | Carrot            |
| Zucchini                  | Celery            |

| Version A                   | Version B            |
|-----------------------------|----------------------|
| <b>Unhealthy food words</b> |                      |
| Almond                      | Cashew nut           |
| Apple pie                   | Blueberry pie        |
| Brazil nut                  | Hazelnut             |
| Cheese puffs                | Peanut               |
| Chocolate ball              | Chocolate cake       |
| Chocolate wafers            | Daim chocolate       |
| Cream cake                  | Eton mess            |
| Danish pastry               | Cinnamon bun         |
| Dill potato chips           | Grilled potato chips |
| Fruit toffee                | Toffee               |
| Hamburger                   | Cheeseburger         |
| Hot dog plate               | Lasagna              |
| Hotdog                      | Grill sausage        |
| Kebab                       | Pizza                |
| Muffin                      | Semla                |
| Nougat                      | Candy cane           |
| Pistachio                   | Pecan                |
| Salmiak                     | Licorice             |
| Schnitzel                   | Meatballs            |
| Winegums                    | Marshmallow          |
